# Supplementary material
Source: bioRxiv or medRxiv preprint supplement (https://medrxiv.org/content/medrxiv/early/2021/02/04/2021.02.01.21250946/DC4/embed/media-4.pdf)
Supplement: Supplementary file [file media-4.pdf]

**(a) Participant survey responses**

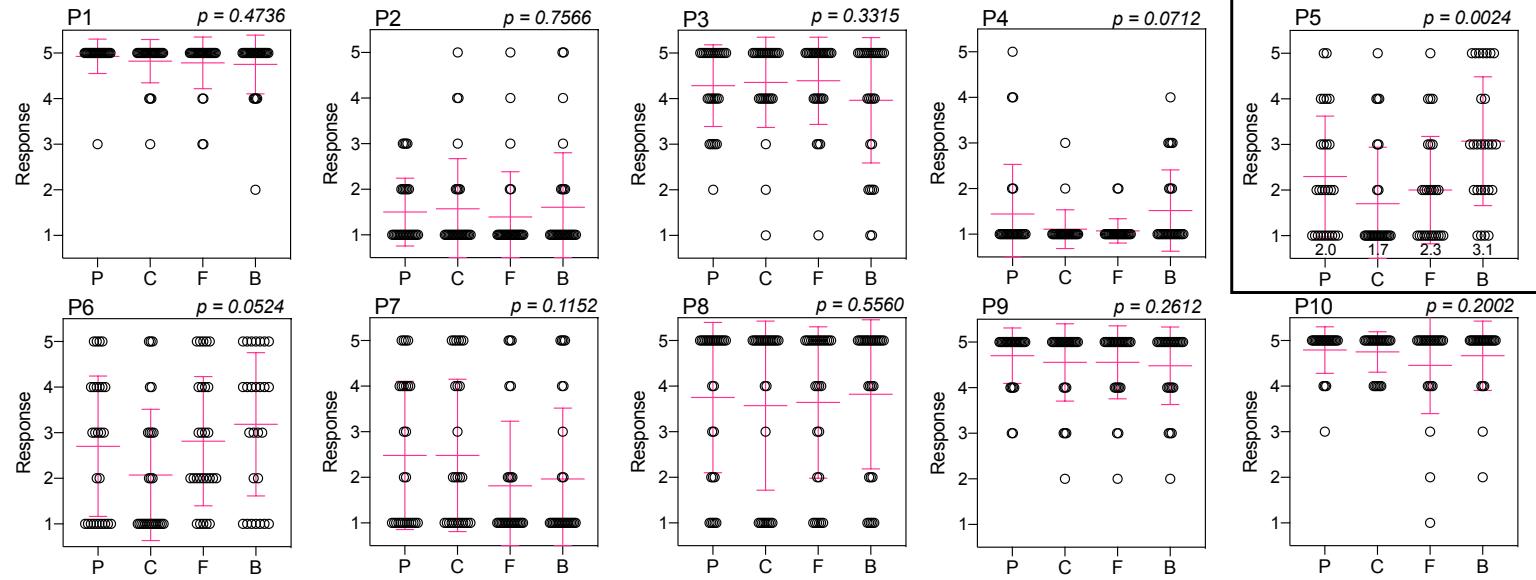

**(b) Observer survey responses**

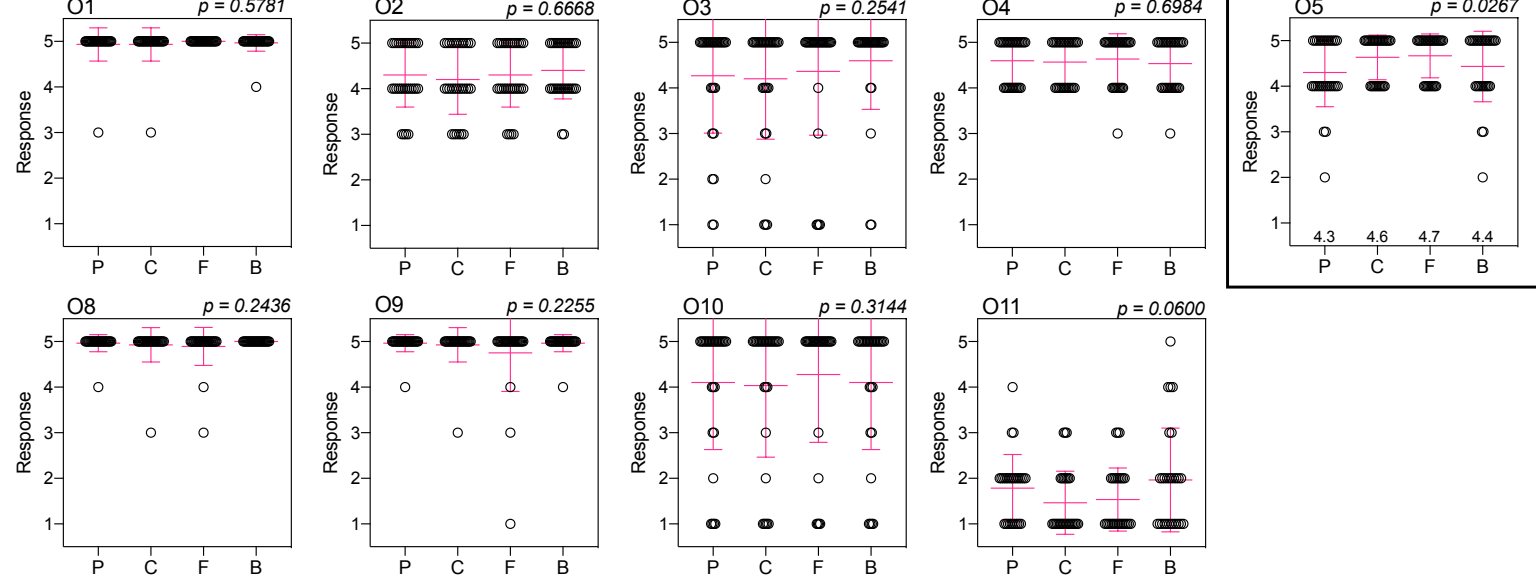

**Supplementary Figure 2: Responses to participant and observer surveys.** Mean and standard deviation are marked in pink. Survey data were analyzed using one-way ANOVA. Responses to two questions (P5 and O5) differed significantly across devices and are denoted with black boxes. The numbers shown on the x-axis of those graphs are the mean response value.
